# Supplementary material for: From root to fruit: RNA-Seq analysis shows that arbuscular mycorrhizal symbiosis may affect tomato fruit metabolism
Source: PubMed Central journal article supplement (PMC3997964; doi:10.1186/1471-2164-15-221), 2014-03-21
Supplement: 12864_2013_7042_MOESM1_ESM.pdf [file 12864_2013_7042_MOESM1_ESM.pdf]

|             | <i>CONTROL</i> | <i>MYC</i>          |
|-------------|----------------|---------------------|
| C (%)       | 40.29 ± 0.81   | <b>39.42 ± 0.56</b> |
| N (%)       | 2.23 ± 0.17    | <b>1.29 ± 0.54</b>  |
| K (mg/g DW) | 45.86 ± 1.78   | 47.97 ± 4.57        |
| P (mg/g DW) | 3.20 ± 1.10    | 2.63 ± 0.57         |
| S (mg/g DW) | 1.70 ± 0.68    | 1.66 ± 0.34         |

**Supplemental Table 1.** Mineral content (C, N, K, P, S) of fully ripe CONTROL and MYC tomato fruit. Values are means ± SD (n=5). DW, dry weight. Data highlighted in bold are significantly different (Non parametric Kruskal-Wallis test, p< 0.05).

**Phenology and fruit yield of high fertilized control plants and low fertilized mycorrhizal plants**

|                              | <i>CONTROL</i> | <i>MYC</i>            |
|------------------------------|----------------|-----------------------|
| Vegetative period (DAT)      | 53.27 ± 3.82   | 52.27 ± 3.45          |
| Flowering-First fruit (days) | 15.50 ± 5.88   | 17.33 ± 4.29          |
| Fruiting period (days)       | 53.67 ± 14.47  | <b>104.31 ± 21.48</b> |
| Average fruit number/plant   | 2.00 ± 1.41    | 5.85 ± 2.34           |
| Total fruit production (n°)  | 20             | 88                    |
| Average fruit weight (g)     | 23.35 ± 1.74   | 26.31 ± 1.16          |
| Total fruit yield (g)        | 467            | 2315.28               |

**Supplemental Table 2.** Phenology and fruit yield of CONT and MYC plants: length of the vegetative period (expressed in days after transplanting, DAT), number of days from flowering to the first fruit, fruiting period length, average fruit number per plant, total fruit production, average fruit weight and total fruit yield. Data are expressed as mean ± standard deviation, n=10. Statistically significant data are highlighted in bold according to the non-parametric Kruskal-Wallis test (p< 0.05).

|                                                                       | <i>CONTROL</i>     | <i>MYC</i>                           |
|-----------------------------------------------------------------------|--------------------|--------------------------------------|
| Radical scavenging activity ( $\mu\text{mol trolox}/100\text{g fm}$ ) | 100.89 $\pm$ 3.67  | 127.49 $\pm$ 47.29                   |
| Reducing activity ( $\mu\text{mol trolox}/100\text{g fm}$ )           | 106.68 $\pm$ 15.43 | <b>161.11 <math>\pm</math> 33.84</b> |
| Total phenols (mg GAE/100g fm)                                        | 30.35 $\pm$ 5.75   | 41.50 $\pm$ 14.72                    |
| $\beta$ -Carotene (mg/100g fm)                                        | 4.25 $\pm$ 2.85    | 1.88 $\pm$ 0.41                      |
| Lycopene (mg/100g fm)                                                 | 6.51 $\pm$ 2.69    | 4.55 $\pm$ 0.95                      |

**Supplemental Table 4.** Biochemical and nutraceutical parameters measured in fully ripe CONTROL and MYC tomato fruit. Data highlighted in bold are significantly different (one-way ANOVA with Tukey's posthoc test,  $p < 0.05$ ).

**Supplemental table 5.** Genes and corresponding primers used in real-time RT-PCR

| <b>Gene</b>                                                    | <b>Primer sequence</b>                                         |
|----------------------------------------------------------------|----------------------------------------------------------------|
| Ubiquitin                                                      | UbiF:ACCAAGCCAAAGAAGATCAAGC<br>UbiR:GTGAGCCCACACTTACCACAGT     |
| Cinnamoyl CoA reductase-like protein                           | PaaF:TGGTCAGCCTCGGACACCTGA<br>PaaR:CACGCAGCATCCTCAGCCAATG      |
| Allantoinase                                                   | AlnF:GGCAACCTTTGTGGGCGGAAA<br>AlnR:TGCCATGTGGTTCGTCTCCAACC     |
| Late elongated hypocotyl and circadian clock associated-1-like | LehF:GGCGGGAAGCAGGTAGATCG<br>LehR:CCGATTTCGACGCTCTCCAG         |
| Myc2 transcription factor                                      | BhlfF:CAGGGCGTCCGTTTGTGTG<br>BhlfR:TGGCACATCCTCCTCCTCCA        |
| Inorganic phosphate transporter                                | IptF:TGGACCCAACGCCACCACAT<br>IptR:TGCACCAACCATTGCCCTACC        |
| Putative acid phosphatase                                      | PtaseF:GCGATTTCTGCCCCAGTTTG<br>PtaseR:CACTCGTGGACCCCTGCTTT     |
| Glutamine synthetase                                           | GsF:CGCCGCCAGCTTCAAACAT<br>GsR:CCTCAAGGGTTGGTCCCACA            |
| Acid beta-fructofuranosidase                                   | AivF:AGGCATTTTGGGACCATTTG<br>AivR:GTCTCTGCACGACCATCAGC         |
| Nodulin family protein                                         | NodulinF:CCTTCCCCTCGGCTCATTTC<br>NodulinR:GTGTTGCCACCACTCGCTGT |
| Deoxyxylulose 5-phosphate synthase                             | DXSrtf:GCTTCCGGCTGGAACAAAGG<br>DXSrr:CCGCGGGATTCTAGCACAAATAG   |
| Hydroxymethylbutenyl diphosphate reductase                     | HDRrtf:CGACAAACGCAATTCGCTCAC<br>HDRrr:CGGAGCATCTGATGACGGAG     |
| Phytoene synthase                                              | PSYrtf:TGAGGCAGGCAGCCTTGGTG<br>PSYrr:GCCCAAATTCCCCGGAATAGG     |
| Lipoxygenase TomloxC                                           | Loxrtf:TTGCCTATGGTGCTGAATGG<br>Loxrtr:TGGATCTTCTCTGCCAATC      |
| Carotenoid cleavage dioxygenase                                | CCDrtf:TGACCCACAAAGAAGGCTCG<br>CCDrr:CCCAAGCATTGGCGTTGTGG      |
